# Supplementary material for: Natural Product Target Network Reveals Potential for Cancer Combination Therapies
Source: PubMed Central journal article supplement (PMC6555193; doi:10.3389/fphar.2019.00557), 2019-05-31
Supplement: Image_1.pdf [file Image_1.pdf]

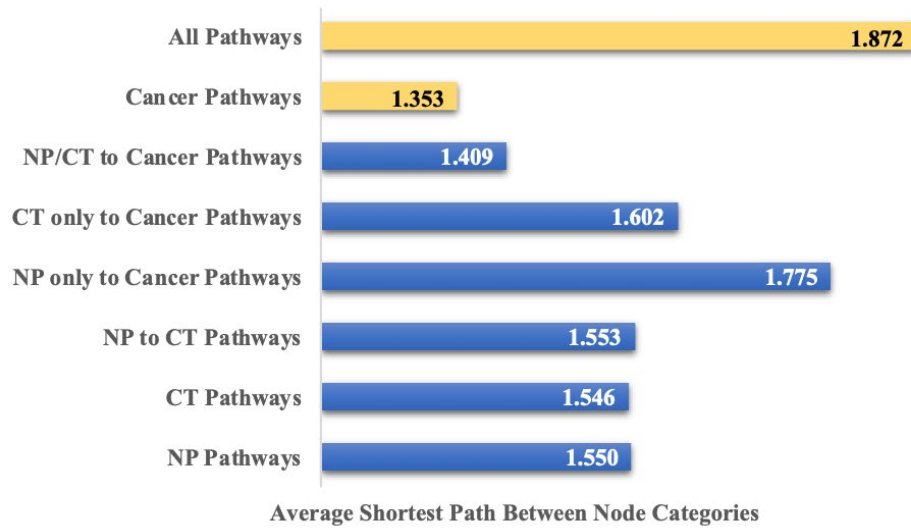

**S1. Pathway-Pathway network analysis.** Average shortest path distances in blue were all shorter than random controls, except for NP only and CT only nodes to cancer nodes (empirical  $p < .01$ , 1000 permutations).
